# Supplementary material for: Association of Exposure to Endocrine-Disrupting Chemicals During Adolescence With Attention-Deficit/Hyperactivity Disorder–Related Behaviors
Source: PubMed Central journal article supplement (PMC7455852; doi:10.1001/jamanetworkopen.2020.15041), 2020-08-28

## Supplementary Online Content

Shoaff JR, Coull B, Weuve J, et al. Association of exposure to endocrine-disrupting chemicals during adolescence with attention-deficit/hyperactivity disorder–related behaviors. *JAMA Netw Open*. 2020;3(8):e2015041.  
doi:10.1001/jamanetworkopen.2020.15041

**eTable 1.** Characteristics of 528 New Bedford Cohort Participants Assessed as Adolescents Compared With the Subset of 205 Who Provided Urine Samples for EDC Exposure Assessment

**eTable 2.** Adjusted Relative Risk (95% Confidence Intervals) of ADHD-Related Behavior Problems Associated With a 2-Fold (log<sub>2</sub>) Increase in Urinary Biomarker Concentrations in New Bedford Cohort Adolescents (N=164-190)

**eTable 3.** Adjusted Relative Risk (95% Confidence Interval) of Significant ADHD-Related Behavior Problems in New Bedford Cohort Adolescents Associated With a 2-Fold (log<sub>2</sub>) Increase in Urinary Biomarker Concentrations (N=164-190) for Individual, Rather Than Summed, Chemical Measures

**eTable 4.** Sensitivity Analyses for the Adjusted Relative Risk (95% Confidence Interval) of Significant ADHD-Related Behavior Problems Associated With a 2-Fold (log<sub>2</sub>) Increase in Urinary Biomarker Concentrations in New Bedford Cohort Adolescents

**eTable 5.** Additional Sensitivity Analyses for the Adjusted Relative Risk (95% Confidence Interval) of Significant ADHD-Related Behavior Problems Associated With a 2-Fold (log<sub>2</sub>) Increase in Urinary Biomarker Concentrations in New Bedford Cohort Adolescents

**eFigure.** Determination of Final Analytic Sample for Assessment of New Bedford Cohort Adolescents

This supplementary material has been provided by the authors to give readers additional information about their work.

**eTable 1.** Characteristics of 528 New Bedford Cohort Participants Assessed as Adolescents Compared With the Subset of 205 Who Provided Urine Samples for EDC Exposure Assessment

|                                                                                          | Urine study sample<br>(n=205) | Full sample<br>(n=528) |
|------------------------------------------------------------------------------------------|-------------------------------|------------------------|
| <b>Frequency of ADHD-related behavioral problems (n, (%))<sup>a</sup></b>                |                               |                        |
| Significant ADHD-associated behavior problem on at least one scale <sup>b</sup>          | 82 (40)                       | 218 (41)               |
| Possible significant ADHD-associated behavior problem on at least one scale <sup>b</sup> | 134 (65)                      | 346 (65)               |
|                                                                                          |                               |                        |
| <b>Child Characteristics (n (%))</b>                                                     |                               |                        |
| <b>Gender</b>                                                                            |                               |                        |
| Male                                                                                     | 93 (45)                       | 255 (48)               |
| Female                                                                                   | 112 (55)                      | 273 (52)               |
| Missing                                                                                  | 0 (0)                         | 0 (0)                  |
| <b>Race</b>                                                                              |                               |                        |
| Non-Hispanic White                                                                       | 124 (60)                      | 364 (69)               |
| Non White                                                                                | 81 (40)                       | 164 (31)               |
| Missing                                                                                  | 0 (0)                         | 0 (0)                  |
| <b>Age at in-person testing</b>                                                          |                               |                        |
| 14-15                                                                                    | 164 (80)                      | 328 (62)               |
| 16-17                                                                                    | 41 (20)                       | 200 (38)               |
| Missing                                                                                  |                               |                        |
| <b>Diagnosis of a behavioral disorder other than ADHD<sup>c</sup></b>                    |                               |                        |
| No                                                                                       | 131 (64)                      | 346 (66)               |
| Yes                                                                                      | 74 (36)                       | 182 (34)               |
| Missing                                                                                  | 0 (0)                         | 0 (0)                  |
| <b>Use of medication for a behavioral disorder<sup>d</sup></b>                           |                               |                        |
| No                                                                                       | 183 (89)                      | 480 (91)               |
| Yes                                                                                      | 22 (11)                       | 48 (9)                 |
| Missing                                                                                  | 0 (0)                         | 0 (0)                  |
| <b>Maternal Characteristics at time of Child's Birth (n (%))</b>                         |                               |                        |
| <b>Age (years)</b>                                                                       |                               |                        |
| <20                                                                                      | 21 (10)                       | 67 (13)                |
| 20-29                                                                                    | 127 (62)                      | 307 (58)               |
| ≥30                                                                                      | 57 (28)                       | 154 (29)               |
| Missing                                                                                  | 0 (0)                         | 0 (0)                  |
| <b>Household income (\$/year)</b>                                                        |                               |                        |
| <20,000                                                                                  | 66 (32)                       | 166 (31)               |
| 20-<40,000                                                                               | 70 (34)                       | 179 (34)               |
| 40-<75,000                                                                               | 53 (26)                       | 152 (29)               |
| ≥75,000                                                                                  | 10 (5)                        | 18 (3)                 |
| Missing                                                                                  | 6 (3)                         | 13 (2)                 |
| <b>Marital status</b>                                                                    |                               |                        |

|                                             |          |          |
|---------------------------------------------|----------|----------|
| Married                                     | 106 (52) | 296 (56) |
| Unmarried                                   | 87 (42)  | 206 (39) |
| Missing                                     | 12 (6)   | 26 (5)   |
| <b>Education</b>                            |          |          |
| <High School                                | 30 (15)  | 76 (14)  |
| High School or more                         | 169 (82) | 440 (83) |
| Missing                                     | 6 (3)    | 12 (2)   |
| <b>Smoking during pregnancy</b>             |          |          |
| Yes                                         | 56 (27)  | 125 (24) |
| No                                          | 134 (65) | 362 (69) |
| Missing                                     | 15 (7)   | 41 (8)   |
| <b>Alcohol consumption during pregnancy</b> |          |          |
| Yes                                         | 38 (19)  | 92 (17)  |
| No                                          | 141 (69) | 358 (68) |
| Missing                                     | 26 (13)  | 78 (15)  |

<sup>a</sup>ADHD-related behavior measures include: CADS parent/teacher-report of inattention, hyperactivity, and ADHD; BASC parent/teacher/self-report of hyperactivity and inattention; and BASC parent/teacher-report of executive function.

<sup>b</sup>Significant behavior problem: scale t-score dichotomized at the 98<sup>th</sup> percentile; Possible significant problem: scale t-score dichotomized at the 85<sup>th</sup> percentile

<sup>c</sup>Pediatric medical record or parental reported diagnosis of a behavioral disorder

<sup>d</sup>Parental reported child use of medication for a behavioral disorder

**eTable 2.** Adjusted<sup>a</sup> Relative Risk (95% Confidence Intervals) of ADHD-Related Behavior Problems<sup>b</sup> Associated With a 2-Fold (log2) Increase in Urinary Biomarker Concentrations in New Bedford Cohort Adolescents (N=164-190)

| Chemical Biomarker                      | Significant behavior problem <sup>b</sup> |                    |                    | Possible significant behavior problem <sup>b</sup> |                   |                   |
|-----------------------------------------|-------------------------------------------|--------------------|--------------------|----------------------------------------------------|-------------------|-------------------|
|                                         | Combined                                  | Males              | Females            | Combined                                           | Males             | Females           |
| ΣAntiandrogenic phthalates <sup>c</sup> | 1.34 (1.00, 1.79)                         | 1.63 (1.14, 2.34)  | 1.16 (0.84, 1.60)  | 1.21 (1.00, 1.47)                                  | 1.19 (0.87, 1.63) | 1.23 (0.99, 1.52) |
| ΣDEHP <sup>d</sup>                      | 1.29 (1.07, 1.55)                         | 1.62 (1.38, 1.91)* | 1.06 (0.85, 1.33)* | 1.20 (1.05, 1.37)                                  | 1.28 (1.06, 1.55) | 1.14 (0.98, 1.32) |
| ΣPersonal care products <sup>e</sup>    | 1.16 (0.98, 1.37)                         | 1.20 (0.97, 1.50)  | 1.12 (0.90, 1.40)  | 1.11 (0.99, 1.25)                                  | 1.08 (0.90, 1.30) | 1.14 (0.98, 1.32) |
| ΣParabens <sup>f</sup>                  | 1.06 (0.96, 1.18)                         | 1.05 (0.94, 1.16)  | 1.09 (0.91, 1.30)  | 1.04 (0.97, 1.11)                                  | 1.01 (0.93, 1.09) | 1.08 (0.96, 1.21) |
| ΣBisphenols <sup>g</sup>                | 1.09 (0.91, 1.31)                         | 1.11 (0.76, 1.64)  | 1.08 (0.88, 1.32)  | 1.01 (0.88, 1.17)                                  | 0.92 (0.70, 1.22) | 1.06 (0.89, 1.26) |
| ΣDichlorophenols <sup>h</sup>           | 1.15 (1.01, 1.32)                         | 1.18 (0.99, 1.40)  | 1.12 (0.90, 1.39)  | 1.09 (0.99, 1.20)                                  | 1.07 (0.94, 1.21) | 1.13 (0.97, 1.33) |

<sup>a</sup>Adjusted for: Child: sex, race, mean test age (across teacher/parent/self-report BASC and CADS measures), urine specific gravity, race; Maternal characteristics at delivery: age, income, marital status, smoking, education; test indicator

<sup>b</sup>ADHD-related behavior measures include: CADS parent/teacher-report of inattention, hyperactivity, and ADHD; BASC parent/teacher/self-report of hyperactivity and inattention; and BASC parent/teacher-report of executive function. Significant behavior problem: scale t-score dichotomized at the 98<sup>th</sup> percentile; Possible significant problem: scale t-score dichotomized at the 85<sup>th</sup> percentile.

<sup>c</sup>sum of: MBP, MiBP, MBzP, MEHP, MEHHP, MEOHP, MECPP, MCOP, MHIBP, MHBP, MNP

<sup>d</sup>sum of: MECPP, MEHHP, MEOHP, MEHP

<sup>e</sup>sum of: MBP, MHBP, MEP, MiBP, MHIBP

<sup>f</sup>sum of: butyl, ethyl, methyl, and propyl parabens

<sup>g</sup>sum of: BPA, BPF, BPS

<sup>h</sup>sum of: 2,4-dichlorophenol, 2,5-dichlorophenol

\*Interaction p-value <0.05

**eTable 3.** Adjusted<sup>a</sup> Relative Risk (95% Confidence Interval) of Significant ADHD-Related Behavior Problems<sup>b</sup> in New Bedford Cohort Adolescents Associated With a 2-Fold (log<sub>2</sub>) Increase in Urinary Biomarker Concentrations (N=164-190) for Individual, Rather Than Summed, Chemical Measures

| ΣAntiandrogenic phthalates |                   | ΣDEHP |                   | ΣPersonal care products |                   | ΣParabens |                   | ΣBisphenols |                   | ΣDichlorophenols |                   | Individual measures not included in a sum |                   |
|----------------------------|-------------------|-------|-------------------|-------------------------|-------------------|-----------|-------------------|-------------|-------------------|------------------|-------------------|-------------------------------------------|-------------------|
| MECPP                      | 1.27 (1.05, 1.54) | MECPP | 1.27 (1.05, 1.54) | MBP                     | 1.45 (1.15, 1.84) | Butyl     | 0.98 (0.95, 1.02) | BPA         | 1.02 (0.93, 1.12) | 2,4-DCP          | 1.11 (1.00, 1.24) | TCC                                       | 1.03 (1.00, 1.07) |
| MEHHP                      | 1.26 (1.06, 1.49) | MEHHP | 1.26 (1.06, 1.49) | MIBP                    | 1.32 (1.07, 1.64) | Ethyl     | 1.07 (0.98, 1.17) | BPF         | 1.01 (0.97, 1.05) | 2,5-DCP          | 1.08 (0.94, 1.25) | TCS                                       | 0.99 (0.89, 1.09) |
| MEHP                       | 1.05 (0.98, 1.12) | MEHP  | 1.05 (0.98, 1.12) | MHIBP                   | 1.16 (0.96, 1.41) | Methyl    | 1.05 (0.94, 1.16) | BPS         | 1.02 (0.94, 1.10) |                  |                   | BP-3                                      | 0.97 (0.9, 1.04)  |
| MEOHP                      | 1.28 (1.07, 1.53) | MEOHP | 1.28 (1.07, 1.53) | MHBP                    | 1.25 (1.03, 1.51) | Propyl    | 1.00 (0.92, 1.09) |             |                   |                  |                   | MHINCH                                    | 0.99 (0.94, 1.05) |
| MBP                        | 1.45 (1.15, 1.84) |       |                   | MEP                     | 1.07 (0.93, 1.23) |           |                   |             |                   |                  |                   | MCNP                                      | 1.19 (0.95, 1.49) |
| MIBP                       | 1.32 (1.07, 1.64) |       |                   |                         |                   |           |                   |             |                   |                  |                   | M CPP                                     | 1.12 (1.02, 1.23) |
| MHIBP                      | 1.16 (0.96, 1.41) |       |                   |                         |                   |           |                   |             |                   |                  |                   |                                           |                   |
| MHBP                       | 1.25 (1.03, 1.51) |       |                   |                         |                   |           |                   |             |                   |                  |                   |                                           |                   |
| MBZP                       | 1.22 (1.05, 1.42) |       |                   |                         |                   |           |                   |             |                   |                  |                   |                                           |                   |
| MNP                        | 1.03 (0.97, 1.10) |       |                   |                         |                   |           |                   |             |                   |                  |                   |                                           |                   |
| MCOP                       | 1.05 (0.91, 1.23) |       |                   |                         |                   |           |                   |             |                   |                  |                   |                                           |                   |

<sup>a</sup>Adjusted for: Child: sex, race, mean test age (across teacher/parent/self-report BASC and CADS measures), urine specific gravity; Maternal characteristics at delivery: age, income, marital status, smoking, education; test indicator

<sup>b</sup>ADHD-related behavior measures include: CADS parent/teacher-report of inattention, hyperactivity, and ADHD; BASC parent/teacher/self-report of hyperactivity and inattention; and BASC parent/teacher-report of executive function. Significant behavior problem: scale t-score dichotomized at the 98<sup>th</sup> percentile

**eTable 4.** Sensitivity Analyses for the Adjusted<sup>a</sup> Relative Risk (95% Confidence Interval) of Significant ADHD-Related Behavior Problems<sup>b</sup> Associated With a 2-Fold (log<sub>2</sub>) Increase in Urinary Biomarker Concentrations in New Bedford Cohort Adolescents

| Chemical Biomarker                      | Main adjusted model <sup>a</sup><br><br>N=164-190 | Unadjusted model <sup>c</sup><br><br>N=178-205 | Multiple imputation <sup>d</sup><br><br>N=205 | Exclude BASC measures with indices indicating a potential threat to validity <sup>e</sup><br><br>N=164-190 | Exclude participants taking medications for behavioral disorder <sup>f</sup><br><br>N=149-171 | Exclude participants with ADHD diagnosis <sup>g</sup><br><br>N=135-156 | Adjusted for behavioral diagnosis other than ADHD <sup>g</sup><br><br>N=164-190 | Adjusted for family history of mental illness <sup>h</sup><br><br>N=164-190 | Exclude siblings<br><br>N=153-177 |
|-----------------------------------------|---------------------------------------------------|------------------------------------------------|-----------------------------------------------|------------------------------------------------------------------------------------------------------------|-----------------------------------------------------------------------------------------------|------------------------------------------------------------------------|---------------------------------------------------------------------------------|-----------------------------------------------------------------------------|-----------------------------------|
| ΣAntiandrogenic phthalates <sup>i</sup> | 1.34 (1.00, 1.79)                                 | 1.27 (1.03, 1.56)                              | 1.37 (1.21, 1.55)                             | 1.34 (1.01, 1.78)                                                                                          | 1.26 (0.90, 1.78)                                                                             | 1.76 (1.33, 2.32)                                                      | 1.34 (1.01, 1.78)                                                               | 1.40 (1.03, 1.89)                                                           | 1.33 (0.99, 1.79)                 |
| ΣDEHP <sup>j</sup>                      | 1.29 (1.07, 1.55)                                 | 1.19 (1.02, 1.39)                              | 1.25 (1.14, 1.38)                             | 1.28 (1.06, 1.54)                                                                                          | 1.32 (1.07, 1.62)                                                                             | 1.46 (1.19, 1.80)                                                      | 1.30 (1.09, 1.56)                                                               | 1.30 (1.08, 1.58)                                                           | 1.29 (1.07, 1.55)                 |
| ΣPersonal care products <sup>k</sup>    | 1.16 (0.98, 1.37)                                 | 1.20 (1.03, 1.39)                              | 1.15 (1.05, 1.25)                             | 1.16 (0.98, 1.37)                                                                                          | 1.11 (0.90, 1.37)                                                                             | 1.31 (1.09, 1.57)                                                      | 1.15 (0.97, 1.36)                                                               | 1.18 (1.00, 1.40)                                                           | 1.18 (0.99, 1.41)                 |
| ΣParabens <sup>l</sup>                  | 1.06 (0.96, 1.18)                                 | 1.06 (0.96, 1.17)                              | 1.03 (0.98, 1.08)                             | 1.05 (0.95, 1.17)                                                                                          | 1.07 (0.95, 1.20)                                                                             | 1.09 (0.99, 1.20)                                                      | 1.06 (0.96, 1.17)                                                               | 1.09 (0.98, 1.21)                                                           | 1.07 (0.96, 1.18)                 |
| ΣBisphenols <sup>m</sup>                | 1.09 (0.91, 1.31)                                 | 1.09 (0.91, 1.31)                              | 1.10 (0.99, 1.23)                             | 1.06 (0.87, 1.27)                                                                                          | 1.12 (0.92, 1.36)                                                                             | 1.13 (0.88, 1.45)                                                      | 1.10 (0.91, 1.33)                                                               | 1.12 (0.94, 1.33)                                                           | 1.08 (0.91, 1.29)                 |
| ΣDichlorophenols <sup>n</sup>           | 1.15 (1.01, 1.32)                                 | 1.09 (0.94, 1.26)                              | 1.11 (1.03, 1.20)                             | 1.15 (1.01, 1.31)                                                                                          | 1.12 (0.96, 1.32)                                                                             | 1.15 (1.00, 1.33)                                                      | 1.17 (1.02, 1.34)                                                               | 1.15 (1.00, 1.33)                                                           | 1.18 (1.02, 1.35)                 |

<sup>a</sup>Adjusted for: Child: sex, race, mean test age (across teacher/parent/self-report BASC and CADS measures), urine specific gravity; Maternal characteristics at delivery: age, income, marital status, smoking, education; test indicator

<sup>b</sup>ADHD-related behavior measures include: CADS parent/teacher-report of inattention, hyperactivity, and ADHD; BASC parent/teacher/self-report of hyperactivity and inattention; and BASC parent/teacher-report of executive function. Significant behavior problem: scale t-score dichotomized at the 98<sup>th</sup> percentile.

<sup>c</sup>Adjusted for specific gravity to account for urine dilution and test indicator

<sup>d</sup>imputation for covariates and chemicals, but not ADHD-related measures

<sup>e</sup>Internal BASC indices indicating potential threats to validity from several factors (overly negative, lack of internal consistency, etc).

<sup>f</sup>Based on medical record review

<sup>g</sup>Based on medical record review and parent report

<sup>h</sup>Based on parent report

<sup>i</sup>sum of: MBP, MiBP, MBzP, MEHP, MEHHP, MEOHP, MECPP, MCOP, MHBP, MHBP, MNP

<sup>j</sup>sum of: MECPP, MEHHP, MEOHP, MEHP

<sup>k</sup>sum of: MBP, MHBP, MEP, MiBP, MHBP

<sup>l</sup>sum of: butyl, ethyl, methyl, and propyl parabens

<sup>m</sup>sum of: BPA, BPF, BPS

<sup>n</sup>sum of: 2,4-dichlorophenol, 2,5-dichlorophenol

**eTable 5.** Additional Sensitivity Analyses for the Adjusted<sup>a</sup> Relative Risk (95% Confidence Interval) of Significant ADHD-Related Behavior Problems<sup>b</sup> Associated With a 2-Fold (log<sub>2</sub>) Increase in Urinary Biomarker Concentrations in New Bedford Cohort Adolescents

| Chemical Biomarker                      | Main adjusted model<br><br>N=164-190 | Adjusted for adolescent BMI z-score<br><br>N=164-190 | Adjusted for max childhood blood lead<br><br>N=147-189 | Adjusted for cord serum PCBs and DDE<br><br>N=163-189 | Adjusted for adolescent substance use <sup>c</sup><br><br>N=164-190 | Adjusted for caffeine consumption <sup>d</sup><br><br>N=164-190 | Adjusted for personal care product use <sup>d</sup><br><br>N=163-189 | Adjusted for canned food and fast food consumption <sup>d</sup><br><br>N=163-189 |
|-----------------------------------------|--------------------------------------|------------------------------------------------------|--------------------------------------------------------|-------------------------------------------------------|---------------------------------------------------------------------|-----------------------------------------------------------------|----------------------------------------------------------------------|----------------------------------------------------------------------------------|
| ΣAntiandrogenic phthalates <sup>f</sup> | 1.34 (1.00, 1.79)                    | 1.33 (0.99, 1.78)                                    | 1.30 (0.97, 1.76)                                      | 1.36 (1.01, 1.83)                                     | 1.27 (0.96, 1.68)                                                   | 1.34 (1.01, 1.78)                                               | 1.37 (1.02, 1.85)                                                    | 1.36 (1.00, 1.85)                                                                |
| ΣDEHP <sup>g</sup>                      | 1.29 (1.07, 1.55)                    | 1.29 (1.07, 1.55)                                    | 1.26 (1.05, 1.52)                                      | 1.29 (1.06, 1.57)                                     | 1.25 (1.03, 1.51)                                                   | 1.30 (1.09, 1.56)                                               | 1.29 (1.08, 1.55)                                                    | 1.31 (1.08, 1.59)                                                                |
| ΣPersonal care products <sup>h</sup>    | 1.16 (0.98, 1.37)                    | 1.16 (0.97, 1.38)                                    | 1.14 (0.94, 1.38)                                      | 1.16 (0.98, 1.38)                                     | 1.15 (0.95, 1.38)                                                   | 1.15 (0.97, 1.36)                                               | 1.16 (0.98, 1.38)                                                    | 1.17 (0.98, 1.39)                                                                |
| ΣParabens <sup>i</sup>                  | 1.06 (0.96, 1.18)                    | 1.07 (0.96, 1.18)                                    | 1.07 (0.96, 1.19)                                      | 1.04 (0.94, 1.15)                                     | 1.04 (0.94, 1.14)                                                   | 1.06 (0.96, 1.17)                                               | 1.07 (0.97, 1.18)                                                    | 1.07 (0.96, 1.18)                                                                |
| ΣBisphenols <sup>j</sup>                | 1.09 (0.91, 1.31)                    | 1.09 (0.90, 1.30)                                    | 1.05 (0.87, 1.27)                                      | 1.08 (0.90, 1.29)                                     | 1.09 (0.90, 1.33)                                                   | 1.10 (0.91, 1.33)                                               | 1.08 (0.90, 1.31)                                                    | 1.07 (0.88, 1.31)                                                                |
| ΣDichlorophenols <sup>k</sup>           | 1.15 (1.01, 1.32)                    | 1.15 (1.01, 1.32)                                    | 1.19 (1.01, 1.40)                                      | 1.17 (1.02, 1.34)                                     | 1.13 (0.98, 1.31)                                                   | 1.17 (1.02, 1.34)                                               | 1.16 (1.01, 1.33)                                                    | 1.16 (1.01, 1.33)                                                                |

<sup>a</sup>Adjusted for: Child: sex, mean test age (across teacher/parent/self-report BASC and CADS measures), urine specific gravity; Maternal characteristics at delivery: age, income, marital status, smoking, education; test indicator

<sup>b</sup>ADHD-related behavior measures include: CADS parent/teacher-report of inattention, hyperactivity, and ADHD; BASC parent/teacher/self-report of hyperactivity and inattention; and BASC parent/teacher-report of executive function. Significant behavior problem: scale t-score dichotomized at the 98<sup>th</sup> percentile

<sup>c</sup>Adolescent report of having smoked a cigarette in the past 30 days or ever having tried marijuana or alcohol

<sup>d</sup>Average from two 24-hour diary reports (or one 24-hour diary report if only one urine sample provided) regarding personal care product use, canned/fast food consumption, and consumption of caffeinated beverage

<sup>f</sup>sum of: MBP, MiBP, MBzP, MEHP, MEHHP, MEOHP, MECPP, MCOP, MHBP, MHBP, MNP

<sup>g</sup>sum of: MECPP, MEHHP, MEOHP, MEHP

<sup>h</sup>sum of: MBP, MHBP, MEP, MiBP, MHBP

<sup>i</sup>sum of: butyl, ethyl, methyl, and propyl parabens

<sup>j</sup>sum of: BPA, BPF, BPS

<sup>k</sup>sum of: 2,4-dichlorophenol, 2,5-dichlorophenol

**eFigure 1.** Determination of final analytic sample for assessment of New Bedford Cohort adolescents

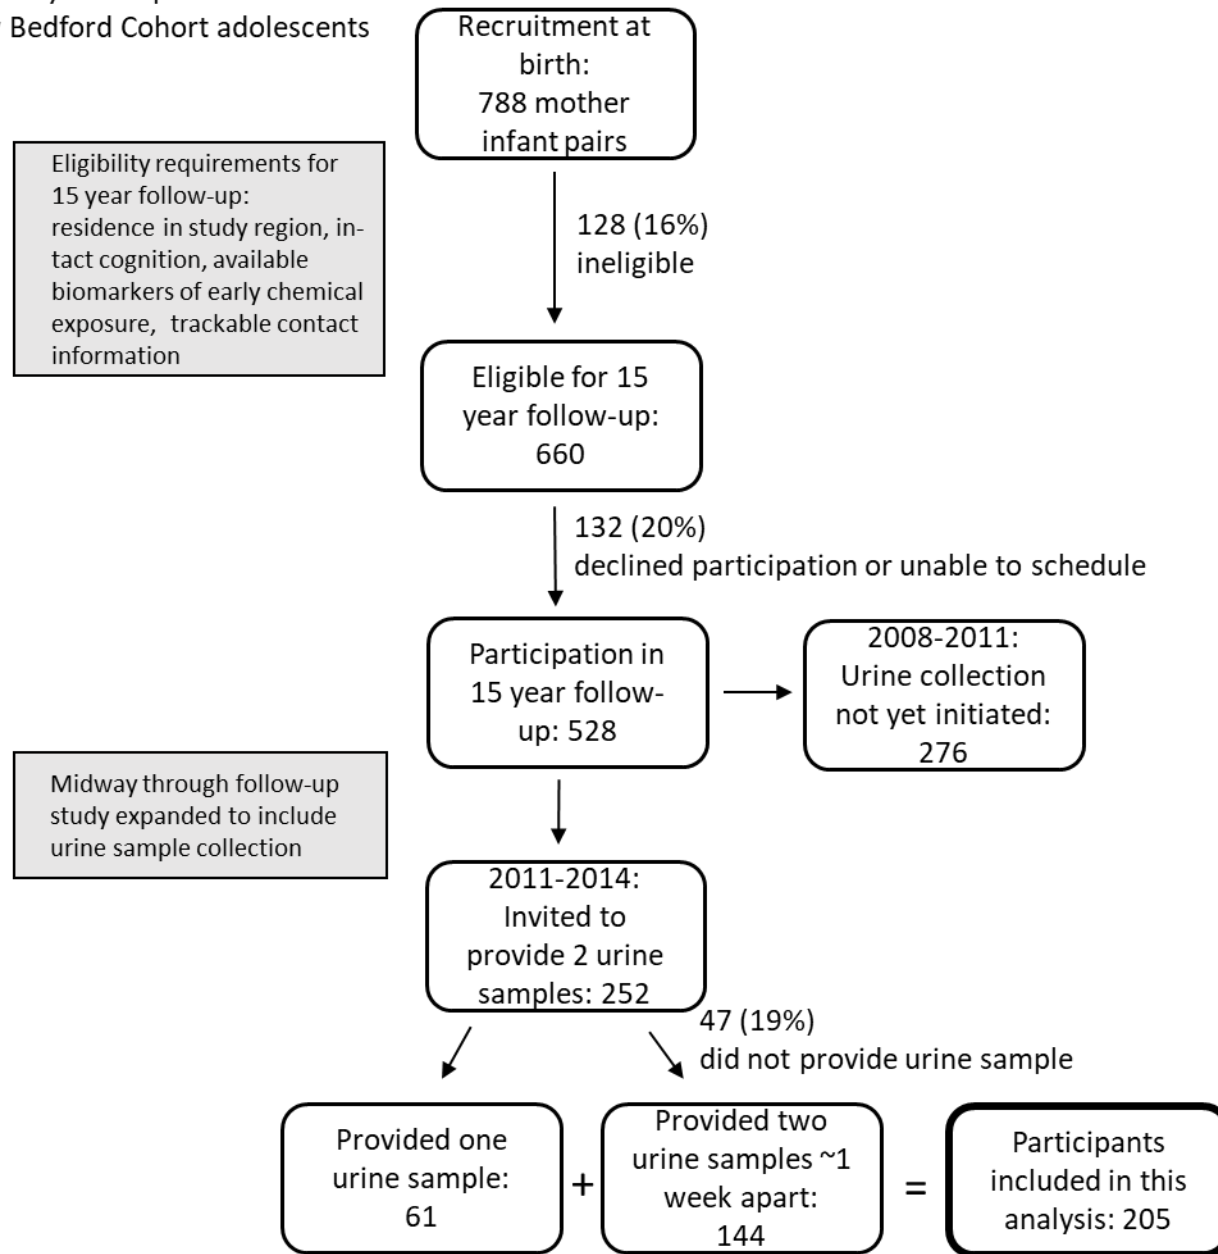

Supplement: jamanetwopen-3-e2015041-s001.pdf [file jamanetwopen-3-e2015041-s001.pdf]
